# Supplementary material for: Undergraduate medical education for neurodivergent students: a scoping review
Source: BMC Med Educ. 2025 Dec 13;26:103. doi: 10.1186/s12909-025-08447-2 (PMC12822054; doi:10.1186/s12909-025-08447-2)
Supplement: Supplementary file 2 — Additional file 2 – Search Strategies. [file 12909_2025_8447_MOESM2_ESM.docx]

*Search Strategies*

| 1. **Portal/Interface:** Ovid |
| --- |
| **Database:** Medline - Ovid MEDLINE(R) and In-Process, In-Data-Review & Other Non-Indexed Citations 1946 to April 18, 2024 |
| **Date:** 19/04/2024 |
| **Limits:** None |
| **Search Terms:**   | 1. | exp Autism Spectrum Disorder/ | | --- | --- | | 2. | exp "Attention Deficit and Disruptive Behavior Disorders"/ | | 3. | exp Learning Disabilities/ | | 4. | neurodiver*.ti,ab,kf. | | 5. | autis*.ti,ab,kf. | | 6. | adhd.ti,ab,kf. | | 7. | learning disab*.ti,ab,kf. | | 8. | Intellectual disab*.ti,ab,kf. | | 9. | learning difficult*.ti,ab,kf. | | 10. | learning disorder*.ti,ab,kf. | | 11. | learning disturbance*.ti,ab,kf. | | 12. | learning impairment.ti,ab,kf. | | 13. | learning problem*.ti,ab,kf. | | 14. | attention deficit.ti,ab,kf. | | 15. | attention disturbance*.ti,ab,kf. | | 16. | dyslexi*.ti,ab,kf. | | 17. | dyspraxi*.ti,ab,kf. | | 18. | dyscalcu*.ti,ab,kf. | | 19. | aphantasi*.ti,ab,kf. | | 20. | autis* spectrum.ti,ab,kf. | | 21. | or/1-20 | | 22. | exp Education, Medical/ | | 23. | exp Education, Nursing/ | | 24. | exp Education, Dental/ | | 25. | exp Education, Pharmacy/ | | 26. | education, predental/ or education, premedical/ | | 27. | exp Students, Health Occupations/ | | 28. | Schools, Medical/ | | 29. | Schools, Dental/ | | 30. | Schools, Nursing/ | | 31. | Schools, Pharmacy/ | | 32. | ((medical or dental or nursing or pharmacy) adj6 education).ti,ab,kf. | | 33. | ((medical or dental or nursing or pharmacy) adj6 student*).ti,ab,kf. | | 34. | ((medical or dental or nursing or pharmacy) adj6 teach*).ti,ab,kf. | | 35. | ((medical or dental or nursing or pharmacy) adj6 program*).ti,ab,kf. | | 36. | ((medical or dental or nursing or pharmacy) adj6 curricul*).ti,ab,kf. | | 37. | ((medical or dental or nursing or pharmacy) adj6 assess*).ti,ab,kf. | | 38. | ((medical or dental or nursing or pharmacy) adj6 exam*).ti,ab,kf. | | 39. | ((medical or dental or nursing or pharmacy) adj6 train*).ti,ab,kf. | | 40. | ((medical or dental or nursing or pharmacy) adj6 study*).ti,ab,kf. | | 41. | (anatomy adj6 (education or student* or teach* or program* or curricul* or assess* or exam* or train* or study*)).ti,ab,kf. | | 42. | (physiology adj6 (education or student* or teach* or program* or curricul* or assess* or exam* or train* or study*)).ti,ab,kf. | | 43. | (biomed* adj6 (education or student* or teach* or program* or curricul* or assess* or exam* or train* or study*)).ti,ab,kf. | | 44. | (sport* adj6 (education or student* or teach* or program* or curricul* or assess* or exam* or train* or study*)).ti,ab,kf. | | 45. | (nutrition adj6 (education or student* or teach* or program* or curricul* or assess* or exam* or train* or study*)).ti,ab,kf. | | 46. | (speech adj6 (education or student* or teach* or program* or curricul* or assess* or exam* or train* or study*)).ti,ab,kf. | | 47. | (healthcare professional adj6 (education or student* or teach* or program* or curricul* or assess* or exam* or train* or study*)).ti,ab,kf. | | 48. | (medicine adj6 (education or student* or teach* or program* or curricul* or assess* or exam* or train* or study*)).ti,ab,kf. | | 49. | (physician adj6 (education or student* or teach* or program* or curricul* or assess* or exam* or train* or study*)).ti,ab,kf. | | 50. | or/22-49 | | 51. | 21 and 50 | | 52. | Child*.ti,ab,kf. | | 53. | 51 not 52 | |
| **Number of Results:** 1937 |

| **Portal/Interface:** Ovid |
| --- |
| **Database:** Embase 1974 to 2024 April 18 |
| **Date:** 19/04/2024 |
| **Limits:** None |
| **Search Terms:**   | 1. | exp Autism/ | | --- | --- | | 2. | exp attention deficit hyperactivity disorder/ | | 3. | exp learning disorder/ | | 4. | neurodiversity/ | | 5. | intellectual impairment/ | | 6. | neurodiver*.ti,ab,kf. | | 7. | autis*.ti,ab,kf. | | 8. | adhd.ti,ab,kf. | | 9. | learning disab*.ti,ab,kf. | | 10. | Intellectual disab*.ti,ab,kf. | | 11. | learning difficult*.ti,ab,kf. | | 12. | learning disorder*.ti,ab,kf. | | 13. | learning disturbance*.ti,ab,kf. | | 14. | learning impairment.ti,ab,kf. | | 15. | learning problem*.ti,ab,kf. | | 16. | attention deficit.ti,ab,kf. | | 17. | attention disturbance*.ti,ab,kf. | | 18. | dyslexi*.ti,ab,kf. | | 19. | dyspraxi*.ti,ab,kf. | | 20. | dyscalcu*.ti,ab,kf. | | 21. | aphantasi*.ti,ab,kf. | | 22. | autis* spectrum.ti,ab,kf. | | 23. | or/1-22 | | 24. | exp medical education/ | | 25. | exp nursing education/ | | 26. | exp dental education/ | | 27. | exp pharmacy education/ | | 28. | exp premedical student/ | | 29. | exp health student/ | | 30. | exp medical school/ | | 31. | exp pharmacy school/ | | 32. | ((medical or dental or predental or nursing or pharmacy) adj6 education).ti,ab,kf. | | 33. | ((medical or dental or predental or nursing or pharmacy) adj6 student*).ti,ab,kf. | | 34. | ((medical or dental or predental or nursing or pharmacy) adj6 teach*).ti,ab,kf. | | 35. | ((medical or dental or predental or nursing or pharmacy) adj6 program*).ti,ab,kf. | | 36. | ((medical or dental or predental or nursing or pharmacy) adj6 curricul*).ti,ab,kf. | | 37. | ((medical or dental or predental or nursing or pharmacy) adj6 assess*).ti,ab,kf. | | 38. | ((medical or dental or predental or nursing or pharmacy) adj6 exam*).ti,ab,kf. | | 39. | ((medical or dental or predental or nursing or pharmacy) adj6 train*).ti,ab,kf. | | 40. | ((medical or dental or predental or nursing or pharmacy) adj6 study*).ti,ab,kf. | | 41. | (anatomy adj6 (education or student* or teach* or program* or curricul* or assess* or exam* or train* or study*)).ti,ab,kf. | | 42. | (physiology adj6 (education or student* or teach* or program* or curricul* or assess* or exam* or train* or study*)).ti,ab,kf. | | 43. | (biomed* adj6 (education or student* or teach* or program* or curricul* or assess* or exam* or train* or study*)).ti,ab,kf. | | 44. | (sport* adj6 (education or student* or teach* or program* or curricul* or assess* or exam* or train* or study*)).ti,ab,kf. | | 45. | (nutrition adj6 (education or student* or teach* or program* or curricul* or assess* or exam* or train* or study*)).ti,ab,kf. | | 46. | (speech adj6 (education or student* or teach* or program* or curricul* or assess* or exam* or train* or study*)).ti,ab,kf. | | 47. | (healthcare professional adj6 (education or student* or teach* or program* or curricul* or assess* or exam* or train* or study*)).ti,ab,kf. | | 48. | (medicine adj6 (education or student* or teach* or program* or curricul* or assess* or exam* or train* or study*)).ti,ab,kf. | | 49. | (physician adj6 (education or student* or teach* or program* or curricul* or assess* or exam* or train* or study*)).ti,ab,kf. | | 50. | or/24-49 | | 51. | 23 and 50 | | 52. | Child*.ti,ab,kf. | | 53. | 51 not 52 | |
| **Number of Results:** 3894 |

| **Portal/Interface:** Ovid |
| --- |
| **Database:** APA PsycInfo 1806 to April Week 3 2024 |
| **Date:** 19/04/2024 |
| **Limits:** None |
| **Search Terms:**   | 1. | exp autism spectrum disorders/ | | --- | --- | | 2. | exp attention deficit disorder with hyperactivity/ | | 3. | exp Learning Disabilities/ | | 4. | exp neurodiversity/ | | 5. | neurodiver*.ti,ab,id. | | 6. | autis*.ti,ab,id. | | 7. | adhd.ti,ab,id. | | 8. | learning disab*.ti,ab,id. | | 9. | Intellectual disab*.ti,ab,id. | | 10. | learning difficult*.ti,ab,id. | | 11. | learning disorder*.ti,ab,id. | | 12. | learning disturbance*.ti,ab,id. | | 13. | learning impairment.ti,ab,id. | | 14. | learning problem*.ti,ab,id. | | 15. | attention deficit.ti,ab,id. | | 16. | attention disturbance*.ti,ab,id. | | 17. | dyslexi*.ti,ab,id. | | 18. | dyspraxi*.ti,ab,id. | | 19. | dyscalcu*.ti,ab,id. | | 20. | aphantasi*.ti,ab,id. | | 21. | autis* spectrum.ti,ab,id. | | 22. | or/1-21 | | 23. | exp medical education/ | | 24. | exp dental education/ | | 25. | exp medical students/ | | 26. | exp dental students/ | | 27. | exp nursing students/ | | 28. | ((medical or dental or nursing or pharmacy) adj6 school).ti,ab,id. | | 29. | ((medical or dental or nursing or pharmacy) adj6 education).ti,ab,id. | | 30. | ((medical or dental or nursing or pharmacy) adj6 student*).ti,ab,id. | | 31. | ((medical or dental or nursing or pharmacy) adj6 teach*).ti,ab,id. | | 32. | ((medical or dental or nursing or pharmacy) adj6 program*).ti,ab,id. | | 33. | ((medical or dental or nursing or pharmacy) adj6 curricul*).ti,ab,id. | | 34. | ((medical or dental or nursing or pharmacy) adj6 assess*).ti,ab,id. | | 35. | ((medical or dental or nursing or pharmacy) adj6 exam*).ti,ab,id. | | 36. | ((medical or dental or nursing or pharmacy) adj6 train*).ti,ab,id. | | 37. | ((medical or dental or nursing or pharmacy) adj6 study*).ti,ab,id. | | 38. | (anatomy adj6 (education or student* or teach* or program* or curricul* or assess* or exam* or train* or study*)).ti,ab,id. | | 39. | (physiology adj6 (education or student* or teach* or program* or curricul* or assess* or exam* or train* or study*)).ti,ab,id. | | 40. | (biomed* adj6 (education or student* or teach* or program* or curricul* or assess* or exam* or train* or study*)).ti,ab,id. | | 41. | (sport* adj6 (education or student* or teach* or program* or curricul* or assess* or exam* or train* or study*)).ti,ab,id. | | 42. | (nutrition adj6 (education or student* or teach* or program* or curricul* or assess* or exam* or train* or study*)).ti,ab,id. | | 43. | (speech adj6 (education or student* or teach* or program* or curricul* or assess* or exam* or train* or study*)).ti,ab,id. | | 44. | (healthcare professional adj6 (education or student* or teach* or program* or curricul* or assess* or exam* or train* or study*)).ti,ab,id. | | 45. | (medicine adj6 (education or student* or teach* or program* or curricul* or assess* or exam* or train* or study*)).ti,ab,id. | | 46. | (physician adj6 (education or student* or teach* or program* or curricul* or assess* or exam* or train* or study*)).ti,ab,id. | | 47. | or/23-46 | | 48. | 22 and 47 | | 49. | Child*.ti,ab,id. | | 50. | 48 not 49 | |
| **Number of Results:** 1507 |

| **Portal/Interface:** EBSCOhost |
| --- |
| **Database:** ERIC |
| **Date:** 19/04/2024 |
| **Limits:** None |
| **Search Terms:**  neurodiver* OR autis* OR adhd OR “attention deficit” OR “learning disab*” OR “Intellectual disab*” OR “learning difficult*” OR “learning disorder*” OR “learning disturbance*” OR “learning impairment” OR “learning problem*” OR “attention deficit*” OR “attention disturbance*” OR dyslexi* OR dyspraxi* OR dyscalcu* OR aphantasi* OR “autis* spectrum”  AND  ((medical OR dental OR nursing OR pharmacy) N6 school) OR ((medical OR dental OR nursing OR pharmacy) N6 education) OR ((medical OR dental OR nursing OR pharmacy) N6 student*) OR ((medical OR dental OR nursing OR pharmacy) N6 teach*) OR ((medical OR dental OR nursing OR pharmacy) N6 program*) OR ((medical OR dental OR nursing OR pharmacy) N6 curricul*) OR ((medical OR dental OR nursing OR pharmacy) N6 assess*) OR ((medical OR dental OR nursing OR pharmacy) N6 exam*) OR ((medical OR dental OR nursing OR pharmacy) N6 train*) OR ((medical OR dental OR nursing OR pharmacy) N6 study*) OR (anatomy N6 (education OR student* OR teach* OR program* OR curricul* OR assess* OR exam* OR train* OR study*)) OR (physiology N6 (education OR student* OR teach* OR program* OR curricul* OR assess* OR exam* OR train* OR study*)) OR (biomed* N6 (education OR student* OR teach* OR program* OR curricul* OR assess* OR exam* OR train* OR study*)) OR (sport* N6 (education OR student* OR teach* OR program* OR curricul* OR assess* OR exam* OR train* OR study*)) OR (nutrition N6 (education OR student* OR teach* OR program* OR curricul* OR assess* OR exam* OR train* OR study*)) OR (speech N6 (education OR student* OR teach* OR program* OR curricul* OR assess* OR exam* OR train* OR study*)) OR (“healthcare professional” N6 (education OR student* OR teach* OR program* OR curricul* OR assess* OR exam* OR train* OR study*)) OR (medicine N6 (education OR student* OR teach* OR program* OR curricul* OR assess* OR exam* OR train* OR study*)) OR (physician N6 (education OR student* OR teach* OR program* OR curricul* OR assess* OR exam* OR train* OR study*))  NOT  Child* |
| **Number of Results:** 763 |

| **Portal/Interface:** ProQuest |
| --- |
| **Database:** Social Sciences Premium Collection |
| **Date:** 19/04/2024 |
| **Limits:** Fields – Anywhere except full text (NOFT) |
| **Search Terms:**  neurodiver* OR autis* OR adhd OR “attention deficit” OR “learning disab*” OR “Intellectual disab*” OR “learning difficult*” OR “learning disorder*” OR “learning disturbance*” OR “learning impairment” OR “learning problem*” OR “attention deficit*” OR “attention disturbance*” OR dyslexi* OR dyspraxi* OR dyscalcu* OR aphantasi* OR “autis* spectrum”  AND  ((medical OR dental OR nursing OR pharmacy) NEAR/6 school) OR ((medical OR dental OR nursing OR pharmacy) NEAR/6 education) OR ((medical OR dental OR nursing OR pharmacy) NEAR/6 student*) OR ((medical OR dental OR nursing OR pharmacy) NEAR/6 teach*) OR ((medical OR dental OR nursing OR pharmacy) NEAR/6 program*) OR ((medical OR dental OR nursing OR pharmacy) NEAR/6 curricul*) OR ((medical OR dental OR nursing OR pharmacy) NEAR/6 assess*) OR ((medical OR dental OR nursing OR pharmacy) NEAR/6 exam*) OR ((medical OR dental OR nursing OR pharmacy) NEAR/6 train*) OR ((medical OR dental OR nursing OR pharmacy) NEAR/6 study*) OR (anatomy NEAR/6 (education OR student* OR teach* OR program* OR curricul* OR assess* OR exam* OR train* OR study*)) OR (physiology NEAR/6 (education OR student* OR teach* OR program* OR curricul* OR assess* OR exam* OR train* OR study*)) OR (biomed* NEAR/6 (education OR student* OR teach* OR program* OR curricul* OR assess* OR exam* OR train* OR study*)) OR (sport* NEAR/6 (education OR student* OR teach* OR program* OR curricul* OR assess* OR exam* OR train* OR study*)) OR (nutrition NEAR/6 (education OR student* OR teach* OR program* OR curricul* OR assess* OR exam* OR train* OR study*)) OR (speech NEAR/6 (education OR student* OR teach* OR program* OR curricul* OR assess* OR exam* OR train* OR study*)) OR (“healthcare professional” NEAR/6 (education OR student* OR teach* OR program* OR curricul* OR assess* OR exam* OR train* OR study*)) OR (medicine NEAR/6 (education OR student* OR teach* OR program* OR curricul* OR assess* OR exam* OR train* OR study*)) OR (physician NEAR/6 (education OR student* OR teach* OR program* OR curricul* OR assess* OR exam* OR train* OR study*))  NOT  Child* |
| **Number of Results:** 2799 |

| **Portal/Interface:** Clarivate |
| --- |
| **Database:** Web of Science |
| **Date:** 19/04/2024 |
| **Limits:** None |
| **Search Terms:**  ((TS=(neurodiver* OR autis* OR adhd OR “attention deficit” OR “learning disab*” OR “Intellectual disab*” OR “learning difficult*” OR “learning disorder*” OR “learning disturbance*” OR “learning impairment” OR “learning problem*” OR “attention deficit*” OR “attention disturbance*” OR dyslexi* OR dyspraxi* OR dyscalcu* OR aphantasi* OR “autis* spectrum”)) AND TS=(((medical OR dental OR nursing OR pharmacy) NEAR/6 school) OR ((medical OR dental OR nursing OR pharmacy) NEAR/6 education) OR ((medical OR dental OR nursing OR pharmacy) NEAR/6 student*) OR ((medical OR dental OR nursing OR pharmacy) NEAR/6 teach*) OR ((medical OR dental OR nursing OR pharmacy) NEAR/6 program*) OR ((medical OR dental OR nursing OR pharmacy) NEAR/6 curricul*) OR ((medical OR dental OR nursing OR pharmacy) NEAR/6 assess*) OR ((medical OR dental OR nursing OR pharmacy) NEAR/6 exam*) OR ((medical OR dental OR nursing OR pharmacy) NEAR/6 train*) OR ((medical OR dental OR nursing OR pharmacy) NEAR/6 study*) OR (anatomy NEAR/6 (education OR student* OR teach* OR program* OR curricul* OR assess* OR exam* OR train* OR study*)) OR (physiology NEAR/6 (education OR student* OR teach* OR program* OR curricul* OR assess* OR exam* OR train* OR study*)) OR (biomed* NEAR/6 (education OR student* OR teach* OR program* OR curricul* OR assess* OR exam* OR train* OR study*)) OR (sport* NEAR/6 (education OR student* OR teach* OR program* OR curricul* OR assess* OR exam* OR train* OR study*)) OR (nutrition NEAR/6 (education OR student* OR teach* OR program* OR curricul* OR assess* OR exam* OR train* OR study*)) OR (speech NEAR/6 (education OR student* OR teach* OR program* OR curricul* OR assess* OR exam* OR train* OR study*)) OR (“healthcare professional” NEAR/6 (education OR student* OR teach* OR program* OR curricul* OR assess* OR exam* OR train* OR study*)) OR (medicine NEAR/6 (education OR student* OR teach* OR program* OR curricul* OR assess* OR exam* OR train* OR study*)) OR (physician NEAR/6 (education OR student* OR teach* OR program* OR curricul* OR assess* OR exam* OR train* OR study*)))) NOT TS=(Child*) |
| **Number of Results:** 2041 |
